# Supplementary material for: Antibacterial Activities of Phenolic Compounds in Miang Extract: Growth Inhibition and Change in Protein Expression of Extensively Drug-Resistant Klebsiella pneumoniae
Source: MDPI journal article supplement (doi:10.3390/antibiotics13060536), 2024-06-09
Supplement: s1 [file s1]

## Supplementary Materials

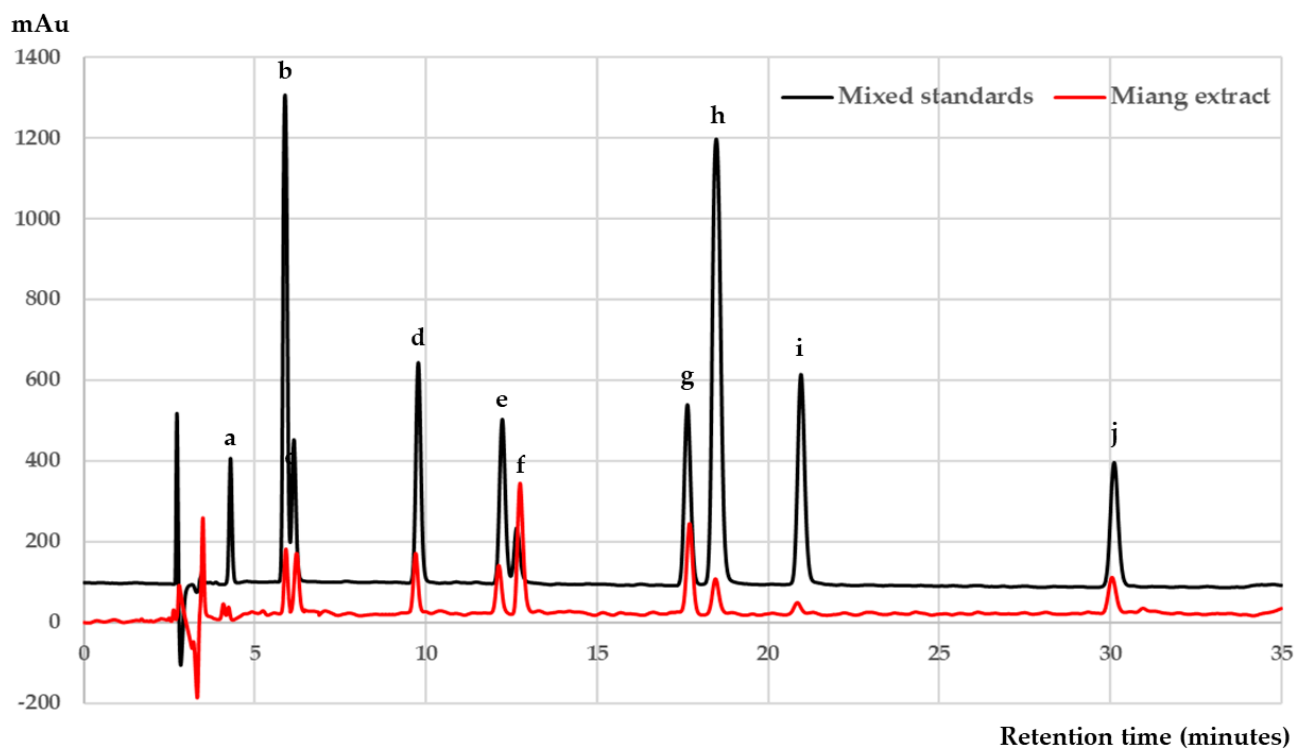

**Figure S1.** HPLC chromatogram of mixed standards and *Miang* extract. The peaks indicate (a) gallic acid, (b) pyrogallol, (c) galocatechin, (d) epigallocatechin, (e) catechin, (f) caffeine, (g) epicatechin, (h) epigallocatechin gallate, (i) galocatechin gallate, and (j) epicatechin gallate.

**Table S1.** Antibiotic susceptibility of antibiotic resistant bacteria and antibiotic susceptible-control strains.

| Antibiotic Class                                 | Antibiotic Agent              | <i>E. coli</i><br>CRE10 | <i>K. pneumoniae</i><br>NH54 | <i>S. aureus</i><br>MRSA08 | <i>S. aureus</i><br>MSSA01 | <i>E. coli</i><br>ATCC25922 |
|--------------------------------------------------|-------------------------------|-------------------------|------------------------------|----------------------------|----------------------------|-----------------------------|
| Macrolide                                        | Erythromycin *                | —                       | —                            | R                          | S                          | —                           |
| Oxazolidinones                                   | Linezolid *                   | —                       | —                            | S                          | S                          | —                           |
| Glycopeptide                                     | Vancomycin *                  | —                       | —                            | S                          | S                          | —                           |
| Lincosamines                                     | Clindamycin *                 | —                       | —                            | R                          | S                          | —                           |
| Penicillins                                      | Ampicillin                    | R                       | R                            | —                          | —                          | S                           |
|                                                  | Oxacillin *                   | —                       | —                            | R                          | S                          | —                           |
| $\beta$ -Lactam/<br>$\beta$ -lactamase inhibitor | Amoxicillin/clavulanic acid   | R                       | R                            | —                          | —                          | S                           |
|                                                  | Cefazolin                     | R                       | R                            | —                          | —                          | S                           |
|                                                  | Cefuroxime                    | R                       | R                            | —                          | —                          | S                           |
| Cephems                                          | Cefoxitin                     | R                       | S                            | R                          | S                          | S                           |
|                                                  | Cefotaxime                    | R                       | R                            | —                          | —                          | S                           |
|                                                  | Ceftazidime                   | R                       | R                            | —                          | —                          | S                           |
| Carbapenems                                      | Imipenem                      | R                       | S                            | —                          | —                          | S                           |
|                                                  | Meropenem                     | R                       | R                            | —                          | —                          | S                           |
|                                                  | Ertapenem                     | R                       | R                            | —                          | —                          | S                           |
| Aminoglycoside                                   | Gentamicin                    | R                       | S                            | R                          | S                          | S                           |
|                                                  | Amikacin                      | R                       | S                            | —                          | —                          | S                           |
| Monobactam                                       | Aztreonam                     | R                       | R                            | —                          | —                          | S                           |
| Fluoroquinolones                                 | Ciprofloxacin                 | R                       | R                            | —                          | —                          | S                           |
|                                                  | Moxifloxacin *                | —                       | —                            | R                          | S                          | —                           |
| Folate pathway inhibitors                        | Trimethoprim/sulfamethoxazole | R                       | R                            | R                          | S                          | S                           |
| Phenocols                                        | Chloramphenicol               | S                       | S                            | —                          | —                          | S                           |
| Tetracyclines                                    | Tetracycline                  | R                       | R                            | —                          | —                          | S                           |
|                                                  | Tigecycline                   | S                       | S                            | —                          | —                          | S                           |
| Fosfomycins                                      | Fosfomycin                    | R                       | R                            | —                          | —                          | S                           |
| Lipopeptides                                     | Colistin<br>(MIC, ug/ml)      | R, 4                    | R, 16                        | —                          | —                          | S, $\leq 2$                 |

\* Antimicrobial agents for gram positive bacterial susceptibility testing.
